# Supplementary material for: A Coral-Derived Compound Improves Functional Recovery after Spinal Cord Injury through Its Antiapoptotic and Anti-Inflammatory Effects
Source: PubMed Central journal article supplement (PMC5039531; doi:10.3390/md14090160), 2016-09-02
Supplement: marinedrugs-14-00160-s001.pdf [file marinedrugs-14-00160-s001.pdf]

# Supplementary Materials: A Coral-Derived Compound Improves Functional Recovery after Spinal Cord Injury through Its Antiapoptotic and Anti-Inflammatory Effects

Chun-Hong Chen, Nan-Fu Chen, Chien-Wei Feng, Shu-Yu Cheng, Han-Chun Hung, Kuan-Hao Tsui, Chi-Hsin Hsu, Ping-Jyun Sung, Wu-Fu Chen and Zhi-Hong Wen

(A)

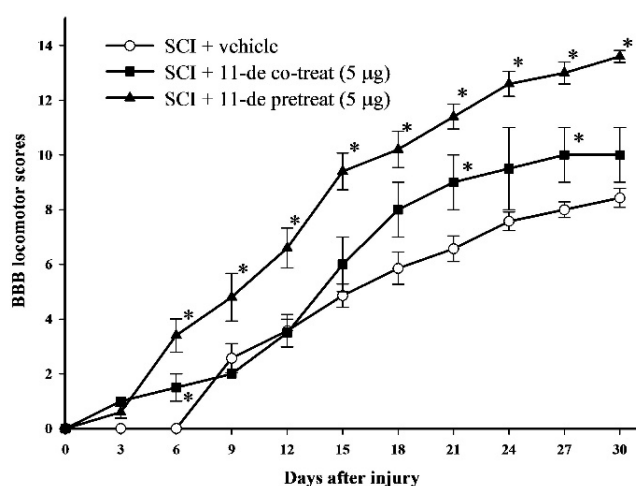

(B)

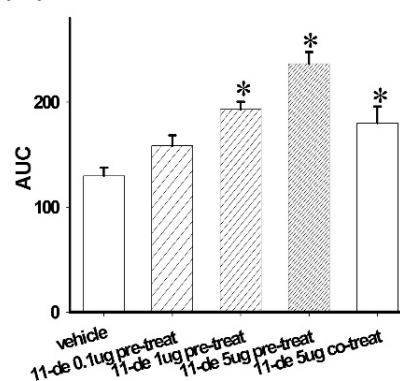

**Figure S1.** Co-treatment with 11-dehydrosinulariolide improved locomotor recovery in rats with SCI. The rats were treated with 11-dehydrosinulariolide immediately after SCI and on the following 6 days (once daily; total, 7 times;  $n = 2$ ). Their behavior showed that the co-treatment process enhanced the recovery after SCI (A). However, the AUC of the co-treatment group was similar to that of the 1- $\mu$ g group (180 and 193, respectively) \*  $p < 0.05$  compared with the vehicle group.
